# Supplementary material
Source: PubMed Central journal article supplement (PMC6683723)
Supplement: ASN.2019010031SupplementaryData.pdf [file ASN.2019010031SupplementaryData.pdf]

**SUPPLEMENTARY DATA: TABLE OF CONTENT**

**SUPPLEMENTARY FIGURE 1: Study flow chart-----2**

**SUPPLEMENTARY FIGURE 2: Evidence for a subtle intermediate phenotype in Het subjects -----3**

**SUPPLEMENTARY TABLE 1: *SLC12A3* gene variants and classifications----- 4**

**SUPPLEMENTARY TABLE 2: PTH, vitamin D metabolites, and bone remodeling markers ----- 7**

**SUPPLEMENTARY TABLE 3: A posteriori calculation of subject samples ----- 8**

**REFERENCES ----- 9**

Figure S1: Study flow chart

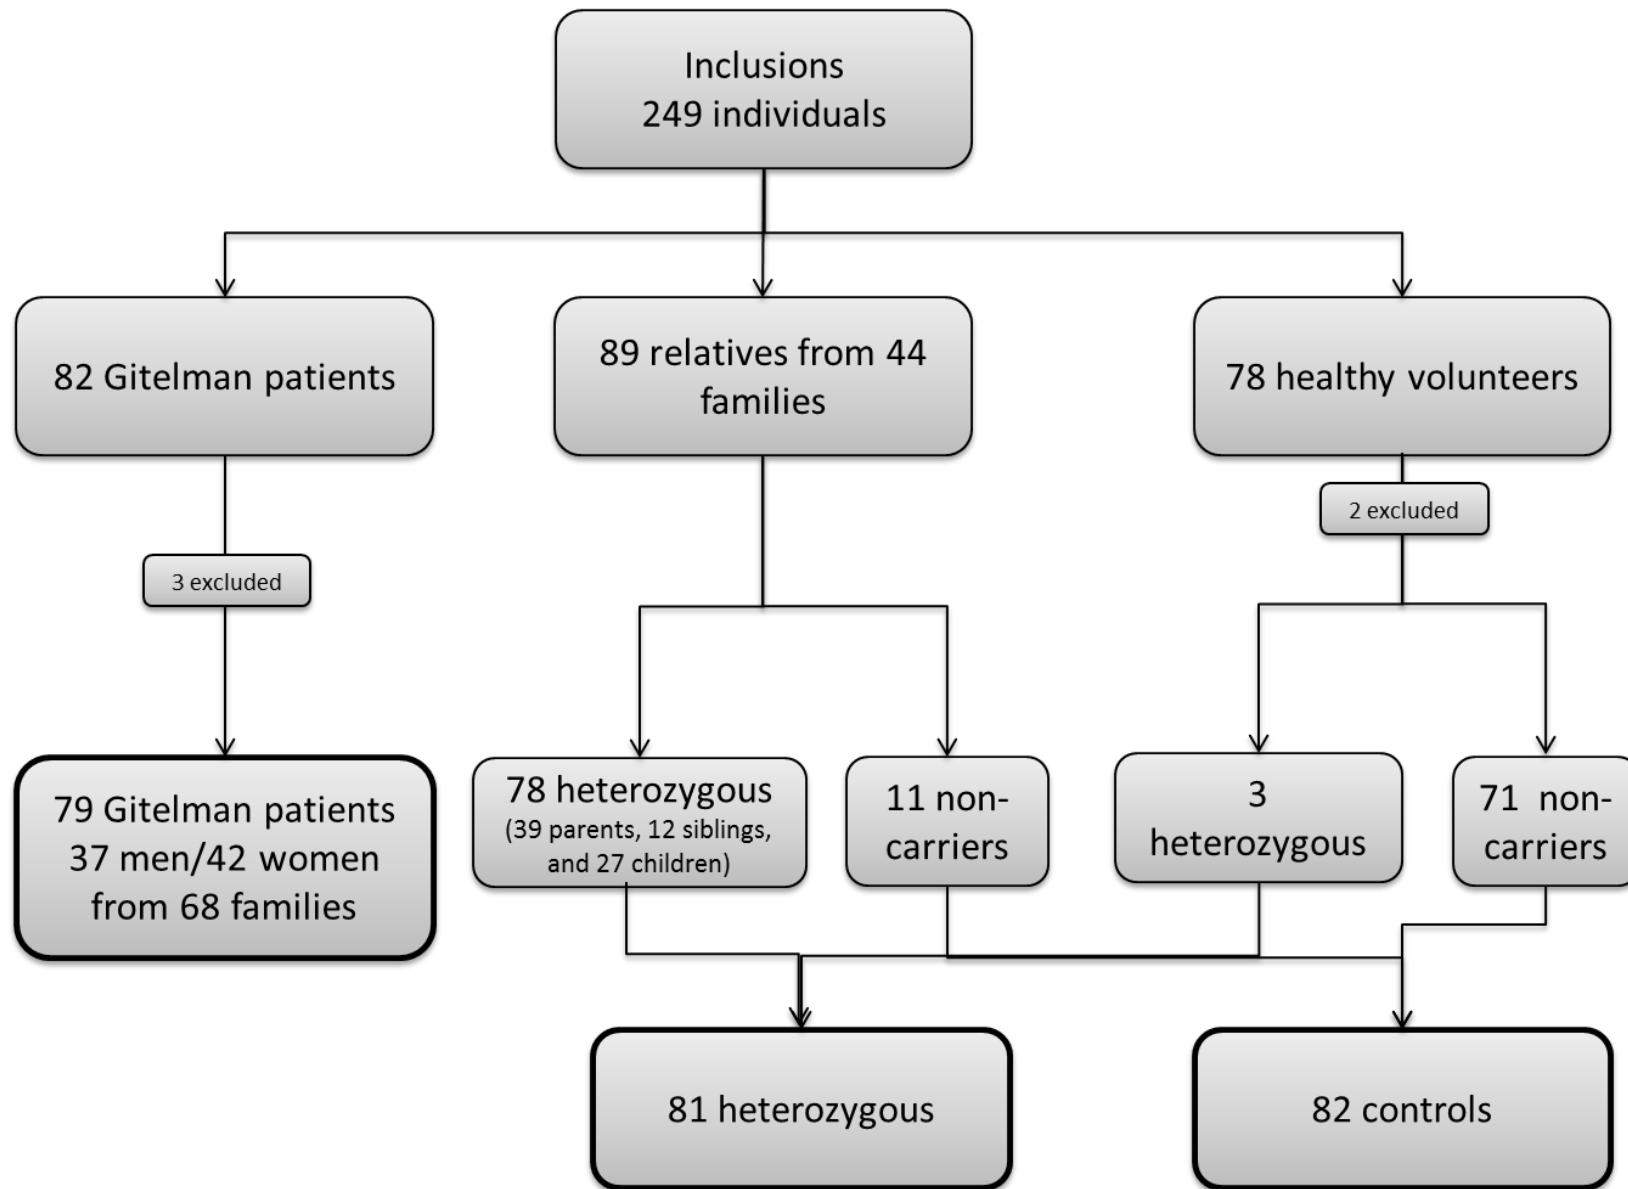

**Figure S2: Evidence for a subtle intermediate phenotype in Het subjects:** Plasma concentrations of renin, aldosterone, calcium, and 7-84 PTH and calcium and aldosterone excretion in HS, Het, and GS groups. Het had significantly higher PAC and plasma calcium than HS and trends for higher aldosterone excretion and plasma PTH concentration. \*  $p > 0.05$  \*\*  $p < 0.001$  \*\*\*  $p < 0.0001$ .

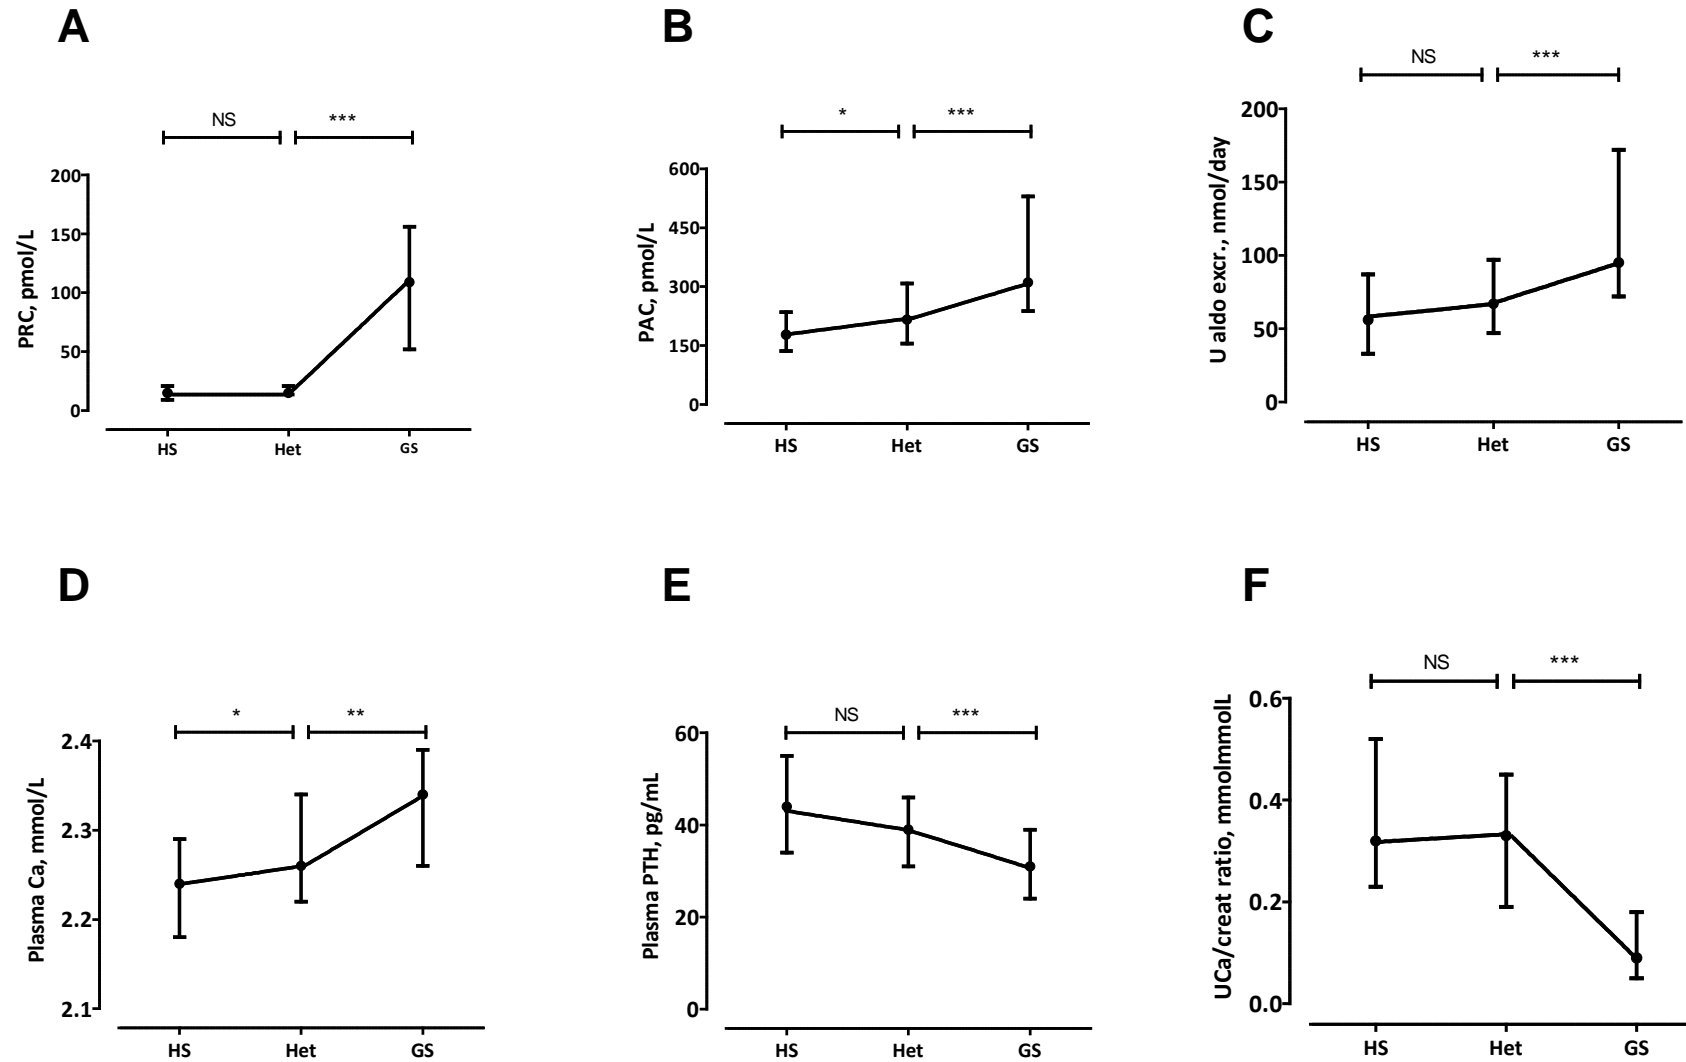

**Supplemental Table 1: Variants detected in GS patients and Het individuals in the *SLC12A3* gene and their classifications**

| Type                | Nomenclature cDNA*                              | Nomenclature protein               | Selected classification criteria   | ACMG class | Ref        | Gitelman Patients |                       | Heterozygous Carriers |
|---------------------|-------------------------------------------------|------------------------------------|------------------------------------|------------|------------|-------------------|-----------------------|-----------------------|
|                     |                                                 |                                    |                                    |            |            | Homozygous        | Compound heterozygous |                       |
| Large rearrangement | c.(?-30)_(964+1_965-1)(E1_E7del)                | p.?                                | PVS1, PM2, PM3, PM4, PP1, PP5      | 5          | [1],[2]    |                   | 1                     |                       |
|                     | c.1169+773_c.1825+247del(E14del) <sup>a</sup>   | p.?                                | PVS1, PM2, PM3, PM4, PP1           | 5          | [2]        |                   | 1                     | 1                     |
|                     | (c.2952-1593_*677delins25)(E26del) <sup>a</sup> | p.?                                | PVS1, PM2, PM3, PM4, PP1           | 5          | [2]        |                   | 2                     | 1                     |
|                     | c.(?-30)_(505+1_506-1)dup(E1_E3dup)             | p.?                                | PVS1, PM2, PM3, PM4, PP1           | 5          | [2]        |                   | 1                     |                       |
|                     | c.(?-30)_(852+1_853-1)dup(E1_E6dup)             | p.?                                | PVS1, PM2, PM3, PM4                | 5          | This study |                   | 1                     |                       |
| Frameshift          | c.20_21del                                      | p.Thr7Argfs*22                     | PVS1, PM2, PM4                     | 5          | [2]        | 0                 | 2                     |                       |
|                     | c.56_57dup                                      | p.Phe20Alafs*8                     | PVS1, PM2, PP1                     | 5          | This study | 1                 | 0                     | 3                     |
|                     | c.293_296dup                                    | p.His99Glnfs*9                     | PVS1, PM2, PM3, PM4                | 5          | [2]        |                   | 1                     |                       |
|                     | c.971_984del                                    | p.Phe325Glyfs*3                    | PVS1, PM2, PM4                     | 5          | [2]        |                   | 1                     |                       |
|                     | c.1196_1202dup                                  | p.Ser402*                          | PVS1, PS4, PM3, PM4, PP5           | 5          | [3]        |                   | 3                     |                       |
|                     | c.1796_1797dup                                  | p.Leu600Serfs*12                   | PVS1, PM2, PM3, PM4                | 5          | [2]        |                   | 1                     | 1                     |
|                     | c.1805_1806del                                  | p.Tyr602Cysfs*31                   | PVS1, PM2, PM3, PM4, PP5           | 5          | [4]        |                   | 1                     |                       |
|                     | c.1832del                                       | p.Asn611Ilefs*61                   | PVS1, PM2, PM3, PM4                | 5          | [2]        |                   | 2                     | 1                     |
|                     | c.2089_2095del                                  | p.Thr697Glyfs*2                    | PVS1, PS4, PM2, PM3, PM4           | 5          | [5]        |                   | 1                     |                       |
|                     | c.2301del                                       | p.Phe767Leufs*8                    | PVS1, PM2, PM3, PM4                | 5          | [2]        |                   |                       | 1                     |
|                     | c.2379dup                                       | p.Phe794Valfs*2                    | PVS1, PM2, PM3, PM4                | 5          | [6]        |                   | 1                     | 2                     |
|                     | c.2877_2878del                                  | p.Arg959Serfs*11                   | PVS1, PM2, PM3, PM4, PP5           | 5          | [7]        |                   | 1                     |                       |
| c.2961dup           | p.Ile988Hisfs*60                                | PVS1, PM1, PM2, PM3, PM4, PP5      | 5                                  | [8]        |            | 1                 | 1                     |                       |
| Nonsense            | c.1687C>T                                       | p.Gln563*                          | PVS1, PM2, PM3, PM4, PP1           | 5          | This study |                   | 1                     | 1                     |
|                     | c.3052C>T                                       | p.Arg1018*                         | PVS1, PM1, PM2, PM3, PM4           | 5          | [9]        |                   | 3                     | 2                     |
| Splice              | c.429+2dupT                                     | p.?                                | PVS1, PM1, PM2, PM3, PP3           | 5          | This study |                   | 1                     |                       |
|                     | c.429+1_c.429+18del                             | p.?                                | PVS1, PM1, PM2, PM3, PP3           | 5          | This study |                   | 1                     |                       |
|                     | c.852+1G>A                                      | p.?                                | PVS1, PM2, PM3, PP1, PP3           | 5          | This study |                   | 2                     | 3                     |
|                     | c.1095+4A>G                                     | p.?                                | PM2, PM3, PP1, PP3                 | 4          | [2]        |                   | 1                     |                       |
|                     | c.1180+1G>T                                     | p.?                                | PVS1, PS4, PM1, PM3, PP3, PP5      | 5          | [10]       | 1                 | 3                     | 1                     |
|                     | c.1444-10G>A                                    | p.?                                | PM2, PM3, PP1, PP3                 | 4          | This study |                   |                       | 1                     |
|                     | c.1826-1G>A                                     | p.?                                | PVS1, PM1, PM2, PM3, PP3           | 5          | [2]        |                   | 1                     | 1                     |
|                     | c.1925+1G>A                                     | p.?                                | PVS1, PM1, PM2, PM3, PP3, PP5      | 5          | [6]        |                   | 1                     | 1                     |
|                     | c.2548+1G>T                                     | p.?                                | PVS1, PM1, PM2, PM3, PP3, PP5      | 5          | [6]        |                   | 1                     |                       |
|                     | c.2660+1G>A                                     | p.?                                | PVS1, PS4, PM1, PM2, PM3, PP3, PP5 | 5          | [11]       | 1                 |                       |                       |
| c.2883+1G>T         | p.?                                             | PVS1, PS4, PM1, PM2, PM3, PP3, PP5 | 5                                  | [12]       | 1          | 6                 | 3                     |                       |
| In frame            | c.674_697delins9                                | p.Phe225_Met233delinsLeuHisThrVal  | PM1, PM2, PM3                      | 4          | [2]        | 0                 | 1                     | 1                     |

| Type      | Nomenclature cDNA*     | Nomenclature protein               | Selected classification criteria  | ACMG class     | Ref        | Gitelman Patients |                       | Heterozygous Carriers |
|-----------|------------------------|------------------------------------|-----------------------------------|----------------|------------|-------------------|-----------------------|-----------------------|
|           |                        |                                    |                                   |                |            | Homozygous        | Compound heterozygous |                       |
| Missense  | c.247C>T               | p.Arg83Trp                         | PS3,PS4, PM2, PM5, PP3, PP5       | 5              | [2],[13]   |                   | 1                     |                       |
|           | c.472C>T               | p.Arg158Trp                        | PM2, PM3, PM5, PP1, PP3           | 4              | This study |                   | 1                     |                       |
|           | c.514T>C               | p.Trp172Arg                        | PS4, PM2, PM3, PP3, PP5           | 5              | [5]        |                   |                       | 1                     |
|           | c.533C>T               | p.Ser178Leu                        | PM1, PM2, PM3, PP1, PP3, PP5      | 5              | [14]       |                   | 1                     |                       |
|           | c.625C>T               | p.Arg209Trp                        | PS3, PM2, PM5, PP3, PP5           | 5              | [12],[15]  | 1                 |                       |                       |
|           | c.644T>C               | p.Leu215Pro                        | PS3, PS4, PM2, PP3, PP5           | 5              | [16],[17]  | 1                 |                       |                       |
|           | c.689G>A               | p.Gly230Asp                        | PM1, PM2, PM3, PP1, PP5           | 4              | [11]       |                   | 1                     |                       |
|           | c.791G>C               | p.Gly264Ala                        | PS3, PM5, PM3, PP5                | 4              | [18],[19]  |                   |                       | 3                     |
|           | c.910A>C               | p.Thr304Pro                        | PM2, PM3, PM5, PP5                | 5              | [20]       |                   | 1                     |                       |
|           | c.911C>T               | p.Thr304Met                        | PS4, PM1, PM2, PM5, PP3           | 4              | [2]        |                   | 1                     | 1                     |
|           | c.938C>T               | p.Ala313Val                        | PS4, PM2, PM3, PP5                | 4              | [14]       |                   | 4                     | 3                     |
|           | c.947G>T               | p.Gly316Val                        | PS3, PS4, PM2, PM3, PM5, PP3      | 5              | [5],[21]   |                   | 1                     | 1                     |
|           | c.1085G>T              | p.Gly362Val                        | PM1, PM2, PM3, PP3                | 4              | [2]        |                   | 1                     |                       |
|           | c.1145C>T              | p.Thr382Met                        | PS4, PM3, PM2, PP1, PP3, PP5      | 5              | [6]        |                   | 1                     |                       |
|           | c.1195C>T              | p.Arg399Cys                        | PS3, PS4, PM2, PM3, PM5, PP3      | 5              | [14],[21]  |                   | 2                     | 2                     |
|           | c.1315G>A              | p.Gly439Ser                        | PS3, PM2, PM3, PP3, PP5           | 5              | [3],[17]   |                   | 2                     | 1                     |
|           | c.1387G>A              | p.Gly463Arg                        | PS3, PS4, PM1, PM2, PM5, PP3      | 5              | [2],[13]   |                   | 2                     |                       |
|           | c.1424C>G              | p.Ser475Cys                        | PS3, PS4, PM2, PP3, PP5           | 5              | [2],[22]   |                   | 2                     |                       |
|           | c.1432A>G              | p.Lys478Glu                        | PM1, PM2, PP3, PP5                | 4              | [3]        |                   | 2                     |                       |
|           | c.1519C>T              | p.Arg507Cys                        | PS4, PM2, PM3, PP3                | 4              | [2]        |                   | 1                     |                       |
|           | c.1567G>A <sup>b</sup> | p.Ala523Thr/p.Cys482_Ala523Leufs*6 | PS3, PM2, PM3, PP3, PP5           | 5              | [21]       |                   | 2                     | 1                     |
|           | c.1664C>T              | p.Ser555Leu                        | PS3, PS4, PM1, PM2, PP3, PP5      | 5              | [14],[21]  |                   | 2                     | 1                     |
|           | c.1763C>T              | p.Ala588Val                        | PS3, PM3, PM2, PP3, PP5           | 5              | [12],[21]  |                   | 2                     |                       |
|           | c.1844C>T              | p.Ser615Leu                        | PM1, PM2, PM5, PP3, PP5           | 4              | [14]       |                   | 1                     |                       |
|           | c.1928C>T              | p.Pro643Leu                        | PS4, PM1, PM2, PM3, PP3, PP5      | 5              | [14]       |                   | 2                     | 2                     |
|           | c.1946C>T              | p.Thr649Met                        | PM1, PM2, PM3, PM5, PP3, PP5      | 4              | [6]        |                   | 2                     |                       |
|           | c.1963C>T              | p.Arg655Cys                        | PM1, PM5, PM2, PM3, PP3, PP5      | 4              | [16]       |                   | 2                     |                       |
|           | c.1964G>A              | p.Arg655His                        | PS4, PM1, PM2, PM3, PM5, PP3, PP5 | 5              | [12]       |                   | 1                     | 1                     |
|           | c.1967C>T              | p.Pro656Leu                        | PM1, PM2, PM3, PP5                | 4              | [2]        |                   | 2                     | 1                     |
|           | c.2191G>A              | p.Gly731Arg                        | PS3, PS4, PM1, PM2, PM3, PP3, PP5 | 5              | [3],[13]   |                   | 5                     | 2                     |
| c.2213T>G | p.Leu738Arg            | PS3, PM2, PM3, PP3, PP5            | 5                                 | [16],[15]      |            | 1                 | 2                     |                       |
| c.2221G>A | p.Gly741Arg            | PS3, PS4, PM1, PM2, PM3, PP3, PP5  | 5                                 | [12],[15],[17] |            | 9                 | 7                     |                       |
| c.2576T>C | p.Leu859Pro            | PS3, PS4, PM2, PM3, PP3, PP5       | 5                                 | [12],[13]      | 1          | 16                | 6                     |                       |
| c.2581C>T | p.Arg861Cys            | PS4, PM1, PM3, PM5, PP3, PP5       | 5                                 | [16]           |            | 9                 | 9                     |                       |
| c.2687G>A | p.Arg896Gln            | PM1, PM2, PM3, PP3, PP5            | 4                                 | [23]           | 1          | 2                 | 4                     |                       |

|           |              |                                   |   |            |   |    |   |
|-----------|--------------|-----------------------------------|---|------------|---|----|---|
| c.2690T>C | p.Leu897Pro  | PM1, PM2, PM3, PP3                | 4 | [2]        |   | 1  |   |
| c.2827C>T | p.Arg943Trp  | PS4, PM2, PM3, PP3                | 5 | [2]        |   | 1  | 3 |
| c.2890C>T | p.Arg964Trp  | PM1, PM2, PM3, PM5                | 4 | [2]        |   | 1  |   |
| c.2981G>A | p.Cys994Tyr  | PS3, PS4, PM1, PM2, PM3, PP3, PP5 | 5 | [5],[17]   |   | 11 | 4 |
| c.2993T>G | p.Leu998Arg  | PM1, PM2, PM3, PP3                | 4 | This study |   | 1  |   |
| c.3006G>C | p.Trp1002Cys | PM1, PM2, PM3, PP3                | 4 | [2]        |   | 1  | 1 |
| c.3077C>T | p.Thr1026Ile | PS3, PM1, PM2, PP3, PP5           | 5 | [15]       | 1 |    |   |

\*Numbering is according to the cDNA sequence (GenBank: NM\_000339.2). The A of the ATG of the initiator methionine codon is nucleotide 1. Novel mutations are in red. <sup>a</sup> The breakpoints of these two large deletions were characterized. <sup>b</sup> Last nucleotide of exon 12 with new transcript lacking exon 12. PVS: very strong evidence of pathogenicity. PVS1: null variant (nonsense, frameshift, canonical +/-1 or 2 splice sites, initiation codon, single or multi-exon deletion) in a gene where loss of function is a known mechanism of disease. PS: strong evidence of pathogenicity. PS1: same amino acid change as a previously established pathogenic variant regardless of nucleotide change. PS3: well-established *in vitro* or *in vivo* functional studies supportive of a damaging effect on the gene or gene product. PS4: the prevalence of the variant in affected individuals is significantly increased compared to the prevalence in controls. PM: moderate evidence of pathogenicity. PM1: Located in a mutational hot spot and/or critical and well-established functional domain without benign variation. PM2: absent from controls (or at extremely low frequency if recessive) in gnomAD database. PM3: detected in *trans* with a pathogenic variant (the phase was determined). PM4: protein length changes due to in-frame deletions/insertions in a non-repeat region or stop-loss variants. PM5: Novel missense change at an amino acid residue where a different missense change determined to be pathogenic has been seen before. PP: supporting evidence of pathogenicity. PP1: co-segregation with disease in multiple affected family members in a gene definitively known to cause the disease. PP3: Multiple lines of computational evidence support a deleterious effect on the gene or gene product. PP5: Reputable source recently reports variant as pathogenic but the evidence is not available to the laboratory to perform an independent evaluation.

**Supplementary Table 2: PTH, vitamin D metabolites, and bone remodeling markers**

|                            | <b>HS</b><br>(n=82)  | <b>Het</b><br>(n=81) | <b>GS</b><br>(n=77) | <b>ANOVA</b><br><i>P</i> value | <b>Unpaired t-test</b><br>HS vs. Het |
|----------------------------|----------------------|----------------------|---------------------|--------------------------------|--------------------------------------|
| <b>Plasma</b>              |                      |                      |                     |                                |                                      |
| Calcium, mmol/L            | 2.24 [2.18;2.29] *** | 2.26 [2.22;2.35] **  | 2.34 [2.26;2.39]    | <0.0001                        | 0.0104                               |
| PTH 7-84, pg/mL            | 44 [34;55] ***       | 39 [31;46] ***       | 31 [24;39]          | <0.0001                        | 0.111                                |
| 25OH vitamin D, nmol/l     | 58 [38;70] **        | 61 [42;76]           | 64 [44;87]          | 0.0119                         | 0.569                                |
| Calcitriol , pmol/l        | 137 [106;158] *      | 141 [114;176] ***    | 116 [91;140]        | <0.0002                        | 0.369                                |
| Osteocalcin, ng/ml         | 24 [20;30] ***       | 24 [20;30] ***       | 17 [13;22]          | <0.0001                        | 1.0000                               |
| Alkaline phosphatase, UI/l | 55 [44;67]           | 56 [47;63]           | 51 [42;61]          | 0.101                          | 0.989                                |
| Collagen 1 C tel., nmol/l  | 3.45 [2.60;4.50] *** | 3.00 [2.10;4.15] *** | 1.70 [1.20;2.80]    | <0.0001                        | 0.641                                |

HS: healthy subjects; Het: heterozygous carrier; GS: Gitelman syndrome. Difference between groups was first evaluated with ANOVA. If significant, Tukey test was performed to compare HS and Het and Dunn's test was performed to compare HS vs. GS and Het vs. GS (\* P<0.05, \*\* P<0.001 \*\*\* P<0.0001). Data are medians [IQR].

**Supplemental Table 3** : A posteriori calculation of the sample size required to yield 80% power

| Parameter         | HS<br>(n=82) <sup>a</sup> | Het<br>(n=74) <sup>a</sup> | Actual<br>p value | Sample size<br>required <sup>b</sup> |
|-------------------|---------------------------|----------------------------|-------------------|--------------------------------------|
| SBP, mmHg         | 117 [111;125]             | 114 [106;127]              | 0.442             | 589                                  |
| DBP, mmHg         | 71 [65;76]                | 68 [63;75]                 | 0.335             | 1,313                                |
| Heart rate, bpm   | 69 [62;76]                | 69 [62;76]                 | 0.996             | 118,174                              |
| Sodium, mmol/L    | 140 [139;141]             | 140 [139;142]              | 1.000             | -                                    |
| Potassium, mmol/L | 4.0 [3.8;4.2]             | 3.9 [3.7;4.1]              | 1.000             | 172                                  |
| Calcium, mmol/l   | 2.24 [2.18;2.29]          | 2.26 [2.21;2.34]           | 0.0190            | 97                                   |
| Magnesium, mmol/l | 0.80 [0.75;0.83]          | 0.80 [0.76;0.84]           | 1.000             | 790                                  |
| PTH7-84, pg/mL    | 44 [34;55]                | 39 [30;40]                 | 0.086             | 158                                  |
| PRC, mUI/ml       | 15 [9;21]                 | 16 [11;23]                 | 0.674             | 844                                  |
| PAC, pmol/L       | 178 [137. 230]            | 213 [154;305]              | 0.081             | 151                                  |
| Na excr, mmol/24h | 147 [99;172]              | 133 [93;189]               | 0.930             | 54,906                               |
| Mg excr, mmol/24h | 3.35 [2.48;4.21]          | 3.32 [2.68;4.26]           | 0.951             | 22,112                               |
| Ca excr, mmol/24h | 3.76 [2.62;5.54]          | 3.51 [2.24;5.23]           | 1.000             | 600                                  |
| UAE, nmol/24h     | 56 [33;87]                | 67 [48;95]                 | 0.109             | 182                                  |

<sup>a</sup>Actual median [IQR] of the parameters measured in HS and Het and actual mean difference observed between group. Considering these differences, the two-sided type 1 error rate is 0.017%. <sup>b</sup>The sample size required per group was calculated to yield 80% power (likelihood that a study will detect the actual difference effect when this difference is indeed present).



## References

1. Cruz, D.N., et al., *Mutations in the Na-Cl cotransporter reduce blood pressure in humans*. Hypertension, 2001. **37**(6): p. 1458-64.
2. Vargas-Poussou, R., et al., *Spectrum of mutations in Gitelman syndrome*. J Am Soc Nephrol. **22**(4): p. 693-703.
3. Mastroianni, N., et al., *Novel molecular variants of the Na-Cl cotransporter gene are responsible for Gitelman syndrome*. Am J Hum Genet, 1996. **59**(5): p. 1019-26.
4. Maki, N., et al., *Four novel mutations in the thiazide-sensitive Na-Cl co-transporter gene in Japanese patients with Gitelman's syndrome*. Nephrol Dial Transplant, 2004. **19**(7): p. 1761-6.
5. Syren, M.L., et al., *Identification of fifteen novel mutations in the SLC12A3 gene encoding the Na-Cl Co-transporter in Italian patients with Gitelman syndrome*. Hum Mutat, 2002. **20**(1): p. 78.
6. Ji, W., et al., *Rare independent mutations in renal salt handling genes contribute to blood pressure variation*. Nat Genet, 2008. **40**(5): p. 592-599.
7. Lin, S.H., et al., *Intrafamilial phenotype variability in patients with Gitelman syndrome having the same mutations in their thiazide-sensitive sodium/chloride cotransporter*. Am J Kidney Dis, 2004. **43**(2): p. 304-12.
8. Ashton, E.J., et al., *Simultaneous sequencing of 37 genes identified causative mutations in the majority of children with renal tubulopathies*. Kidney Int, 2018. **93**(4): p. 961-967.
9. Fukuyama, S., et al., *Analysis of renal tubular electrolyte transporter genes in seven patients with hypokalemic metabolic alkalosis*. Kidney Int, 2003. **64**(3): p. 808-16.
10. Coto, E., et al., *A new mutation (intron 9 +1 G>T) in the SLC12A3 gene is linked to Gitelman syndrome in Gypsies*. Kidney Int, 2004. **65**(1): p. 25-9.
11. Fava, C., et al., *Subjects heterozygous for genetic loss of function of the thiazide-sensitive cotransporter have reduced blood pressure*. Hum Mol Genet, 2008. **17**(3): p. 413-8.
12. Simon, D.B., et al., *Gitelman's variant of Bartter's syndrome, inherited hypokalaemic alkalosis, is caused by mutations in the thiazide-sensitive Na-Cl cotransporter*. Nat Genet, 1996. **12**(1): p. 24-30.
13. Valdez-Flores, M.A., et al., *Functionomics of NCC mutations in Gitelman syndrome using a novel mammalian cell-based activity assay*. Am J Physiol Renal Physiol, 2016. **311**(6): p. F1159-F1167.
14. Cruz, D.N., et al., *Gitelman's syndrome revisited: an evaluation of symptoms and health-related quality of life*. Kidney Int, 2001. **59**(2): p. 710-7.
15. Kunchaparty, S., et al., *Defective processing and expression of thiazide-sensitive Na-Cl cotransporter as a cause of Gitelman's syndrome*. Am J Physiol, 1999. **277**(4 Pt 2): p. F643-9.
16. Lemmink, H.H., et al., *Novel mutations in the thiazide-sensitive NaCl cotransporter gene in patients with Gitelman syndrome with predominant localization to the C-terminal domain*. Kidney Int, 1998. **54**(3): p. 720-30.
17. De Jong, J.C., et al., *Functional expression of mutations in the human NaCl cotransporter: evidence for impaired routing mechanisms in Gitelman's syndrome*. J Am Soc Nephrol, 2002. **13**(6): p. 1442-8.
18. Pantanetti, P., et al., *Severe hypomagnesaemia-induced hypocalcaemia in a patient with Gitelman's syndrome*. Clin Endocrinol (Oxf), 2002. **56**(3): p. 413-8.
19. Moreno, E., et al., *A single nucleotide polymorphism alters the activity of the renal Na<sup>+</sup>:Cl<sup>-</sup> cotransporter and reveals a role for transmembrane segment 4 in chloride and thiazide affinity*. J Biol Chem, 2004. **279**(16): p. 16553-60.
20. Melander, O., et al., *Genetic variants of thiazide-sensitive NaCl-cotransporter in Gitelman's syndrome and primary hypertension*. Hypertension, 2000. **36**(3): p. 389-94.

21. Vargas-Poussou, R., et al., *Spectrum of mutations in Gitelman syndrome*. J Am Soc Nephrol, 2011. **22**(4): p. 693-703.
22. Glaudemans, B., et al., *Novel NCC mutants and functional analysis in a new cohort of patients with Gitelman syndrome*. Eur J Hum Genet. **20**(3): p. 263-70.
23. Kurschat, C., P. Heering, and B. Grabensee, *[Gitelman's syndrome: an important differential diagnosis of hypokalemia]*. Dtsch Med Wochenschr, 2003. **128**(22): p. 1225-8.
